# Supplementary material for: Creation and validation of the harmonized Arabic version of the Expanded Prostate Cancer Index Composite for Clinical Practice (EPIC-CP)
Source: PubMed Central journal article supplement (PMC9067989; doi:10.1080/2090598x.2021.2002636), 2021-11-28
Supplement: TAJU_A_2002636_SM5610.pdf [file TAJU_A_2002636_SM5610.pdf]

**المرضى:** يرجى الاجابة على الاسئلة التالية عن طريق تحديد مربع الاختيار المناسب. جميع الاسئلة تدور حول صحتك والأعراض التي تعرضت لها في الاسبوع الاربعة الأخيرة. اختر إجابة واحدة لكل سؤال.

١. بشكل عام، ما حجم مشكلة الوظيفة البولية (عملية التبول) بالنسبة إليك؟

- لا مشكلة  مشكلة صغيرة جدا  مشكلة صغيرة  مشكلة متوسطة  مشكلة كبيرة

٢. أي من العبارات التالية تصف التحكم البولي الخاص بك بشكل أفضل؟

- تحكّم كلي  تقطّر من وقت الى آخر  تقطّر متطرر  لا يوجد تحكّم

٣. ما عدد الفوط الصحية أو حفاضات البالغين التي تستخدمها يوميا لتسرب البول؟

- لا أستخدم  حفاضة واحدة يوميا  حفاضتان يوميا  ثلاثة حفاضات أو أكثر يوميا

٤. ما حجم المشكلة التي تسبّب فيها تقطّر وتسرب البول، إن وجدت؟

- لا مشكلة  مشكلة صغيرة جدا  مشكلة صغيرة  مشكلة متوسطة  مشكلة كبيرة

**الطاقم الطبي:** أضف الإجابات من الأسئلة ٢-٤  
لحساب درجة اعراض سلس البول (من أصل ١٢):

| لا توجد مشكلة              | مشكلة صغيرة جدا            | مشكلة صغيرة                | مشكلة متوسطة               | مشكلة كبيرة                |
|----------------------------|----------------------------|----------------------------|----------------------------|----------------------------|
| <input type="checkbox"/> ٠ | <input type="checkbox"/> ١ | <input type="checkbox"/> ٢ | <input type="checkbox"/> ٣ | <input type="checkbox"/> ٤ |
| <input type="checkbox"/> ٠ | <input type="checkbox"/> ١ | <input type="checkbox"/> ٢ | <input type="checkbox"/> ٣ | <input type="checkbox"/> ٤ |
| <input type="checkbox"/> ٠ | <input type="checkbox"/> ١ | <input type="checkbox"/> ٢ | <input type="checkbox"/> ٣ | <input type="checkbox"/> ٤ |

٥. ما حجم المشكلة بالنسبة لكل من الأعراض التالية، إن وجدت:

- أ. ألم أو حرقان أثناء التبول .....  
ب. ضعف تدفق البول / عدم إفراغ المثانة كليا .....  
ج. الحاجة المتكررة للبول .....

**الطاقم الطبي:** أضف الإجابات من الأسئلة ٥-٥ ج  
لحساب درجة التهيج أو الانسداد البولي (من أصل ١٢):

| لا توجد مشكلة              | مشكلة صغيرة جدا            | مشكلة صغيرة                | مشكلة متوسطة               | مشكلة كبيرة                |
|----------------------------|----------------------------|----------------------------|----------------------------|----------------------------|
| <input type="checkbox"/> ٠ | <input type="checkbox"/> ١ | <input type="checkbox"/> ٢ | <input type="checkbox"/> ٣ | <input type="checkbox"/> ٤ |
| <input type="checkbox"/> ٠ | <input type="checkbox"/> ١ | <input type="checkbox"/> ٢ | <input type="checkbox"/> ٣ | <input type="checkbox"/> ٤ |
| <input type="checkbox"/> ٠ | <input type="checkbox"/> ١ | <input type="checkbox"/> ٢ | <input type="checkbox"/> ٣ | <input type="checkbox"/> ٤ |

٦. ما حجم المشكلة بالنسبة لكل من الأعراض التالية، إن وجدت:

- أ. ألم في الشرج أو حاجة فُلحة للتبرز .....  
ب. زيادة تكرار التبرز .....  
ج. مشاكل التبرز بشكل عام .....

**الطاقم الطبي:** أضف الإجابات من الأسئلة ٦-٦ ج  
لحساب درجة أعراض الأمعاء (من أصل ١٢):

| لا توجد مشكلة              | مشكلة صغيرة جدا            | مشكلة صغيرة                | مشكلة متوسطة               | مشكلة كبيرة                |
|----------------------------|----------------------------|----------------------------|----------------------------|----------------------------|
| <input type="checkbox"/> ٠ | <input type="checkbox"/> ١ | <input type="checkbox"/> ٢ | <input type="checkbox"/> ٣ | <input type="checkbox"/> ٤ |
| <input type="checkbox"/> ٠ | <input type="checkbox"/> ١ | <input type="checkbox"/> ٢ | <input type="checkbox"/> ٣ | <input type="checkbox"/> ٤ |
| <input type="checkbox"/> ٠ | <input type="checkbox"/> ١ | <input type="checkbox"/> ٢ | <input type="checkbox"/> ٣ | <input type="checkbox"/> ٤ |

٧. كيف تقيّم قدرتك على الوصول الى النشوة الجنسية (الذروة)؟

- ٠ جيدة جدا  ١ جيدة  ٢ مقبولة  ٣ ضعيفة  ٤ ضعيفة جدا أو منعدمة

٨. كيف تصف جودة الانتصاب المعتادة؟

- ٠ انتصاب ضلب  ١ انتصاب كافي  ٢ انتصاب غير كافي  ٣ انتصاب غير كافي لأي نشاط جنسي  ٤ انتصاب غير كافي لأي نشاط جنسي

٩. بشكل عام، ما مدى المشكلة الناتجة عن الوظيفة الجنسية أو انعدام وجودها عليك؟

- لا مشكلة  ١ مشكلة صغيرة جدا  ٢ مشكلة صغيرة  ٣ مشكلة متوسطة  ٤ مشكلة كبيرة

**الطاقم الطبي:** أضف الإجابات من الأسئلة ٦-٦ ج  
لحساب درجة أعراض الأمعاء (من أصل ١٢):

| لا توجد مشكلة              | مشكلة صغيرة جدا            | مشكلة صغيرة                | مشكلة متوسطة               | مشكلة كبيرة                |
|----------------------------|----------------------------|----------------------------|----------------------------|----------------------------|
| <input type="checkbox"/> ٠ | <input type="checkbox"/> ١ | <input type="checkbox"/> ٢ | <input type="checkbox"/> ٣ | <input type="checkbox"/> ٤ |
| <input type="checkbox"/> ٠ | <input type="checkbox"/> ١ | <input type="checkbox"/> ٢ | <input type="checkbox"/> ٣ | <input type="checkbox"/> ٤ |
| <input type="checkbox"/> ٠ | <input type="checkbox"/> ١ | <input type="checkbox"/> ٢ | <input type="checkbox"/> ٣ | <input type="checkbox"/> ٤ |

١٠. ما حجم المشكلة بالنسبة لكل من الأعراض التالية، إن وجدت:

- أ. هبات ساخنة، آلام أو تضخم الثديي .....  
ب. الشعور بالاختتاب .....  
ج. نقص الطاقة .....

**الطاقم الطبي:** أضف الإجابات من الأسئلة ١٠-١٠ ج  
لحساب درجة الأعراض الحيوية/الهرمونية (من أصل ١٢):
